# Supplementary material for: Molybdenum disulfide nanosheet embedded three-dimensional vertically aligned carbon nanotube arrays for extremely-excellent cycling stability lithium-ion anodes
Source: Royal Society of Chemistry journal article supplement (doi:10.1039/c6ra17042k), 2016-01-01
Supplement: c6ra17042k1.pdf [file c6ra17042k1.pdf]

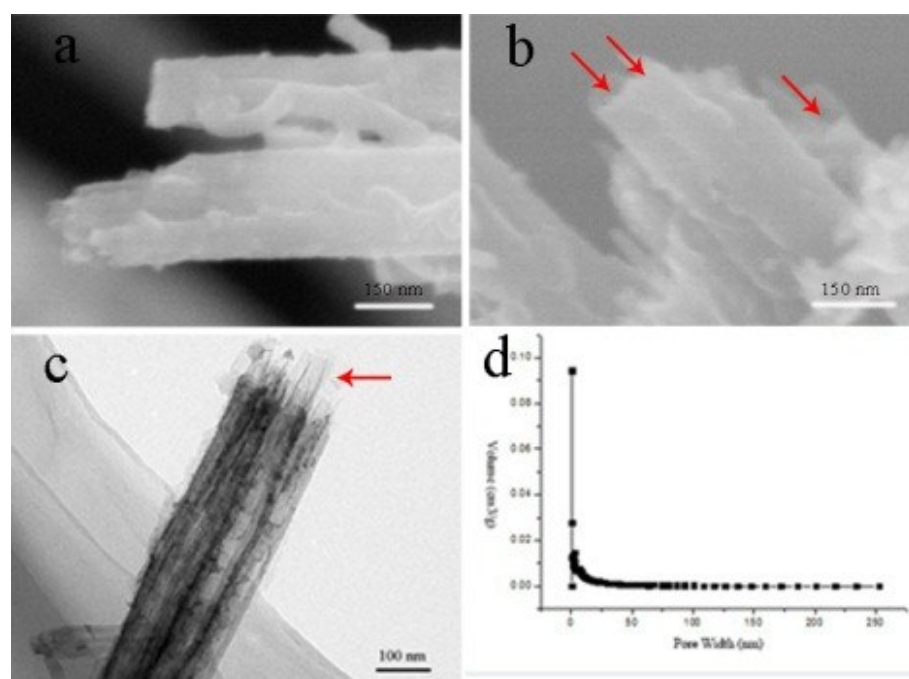

Fig. S1 (a-b) the cross sectional SEM images of MoS<sub>2</sub>/VACNTs-2, (c) TEM image of MoS<sub>2</sub>/VACNTs-2, (d) pore size distribution curves of VACNTs

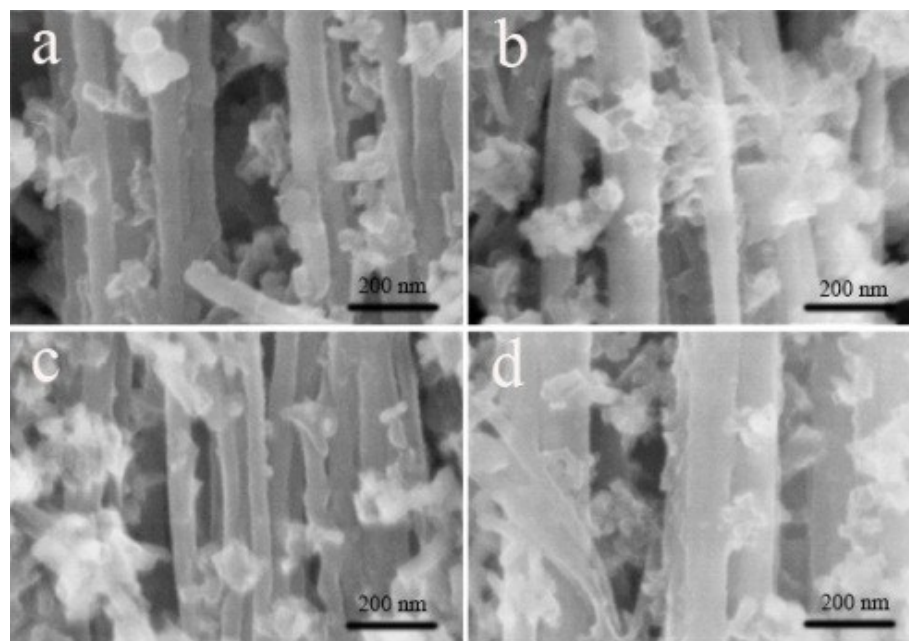

Fig. S2. The SEM of the composites after cycling: (a) MoS<sub>2</sub>/VACNTs-1, (b-c) MoS<sub>2</sub>/VACNTs-2, (d) MoS<sub>2</sub>/VACNTs-3.

Table S1. Comparison of the electrochemical performance of this work with related literature

|                      | Active materials                                | Rate capacity<br>at 1000 mA g <sup>-1</sup> | Capacity after 50 cycle<br>at 100 mA g <sup>-1</sup>            | Capacity after 1000<br>cycle at 5000 mA g <sup>-1</sup> |
|----------------------|-------------------------------------------------|---------------------------------------------|-----------------------------------------------------------------|---------------------------------------------------------|
| Ref. [1]             | CNT@MoS <sub>2</sub> NSs                        | 369 mAh g <sup>-1</sup>                     | 698 mAh g <sup>-1</sup>                                         |                                                         |
| Ref. [2]             | Carbon–CNT–MoS <sub>2</sub>                     |                                             | 522 mAh g <sup>-1</sup>                                         |                                                         |
| Ref. [3]             | MoS <sub>2</sub> /3D graphene<br>networks       | 597 mAh g <sup>-1</sup>                     | 665 mAh g <sup>-1</sup><br>(100 mA g <sup>-1</sup> )            |                                                         |
| Ref. [4]             | Layered<br>MoS <sub>2</sub> /graphene           | 900 mAh g <sup>-1</sup>                     | 1187 mAh g <sup>-1</sup> (100 cycle)                            |                                                         |
| Ref. [5]             | MoS <sub>2</sub> /3D porous<br>carbon nanosheet | 880 mAh g <sup>-1</sup>                     | 1127 mAh g <sup>-1</sup> (200 cycle)                            |                                                         |
| Ref. [6]             | MoS <sub>x</sub> /CNTs<br>(2 ≤ x ≤ 3)           | 358 mAh g <sup>-1</sup>                     | 1000 mAh g <sup>-1</sup><br>(45 cycle, 100 mA g <sup>-1</sup> ) |                                                         |
| <b>This<br/>work</b> | MoS <sub>2</sub> /VACNTs                        | 864 mAh g <sup>-1</sup>                     | 969 mAh g <sup>-1</sup> (100 cycle)                             | 497 mAh g <sup>-1</sup>                                 |

CNT: carbon nanotubes, VACNTs: vertically aligned carbon nanotube arrays, NSs: nanosheets

Ref. [1] Chem. Eur. J., 2011, 17, 13142–13145

Ref. [2] Materials Letters, 130(2014)240–244

Ref. [3] small, 2013, 9, No. 20, 3433–3438

Ref. [4] Nano, 2011, 5 (6), 4720–4728

Ref. [5] Nano, 2015, 9 (4), 3837–3848

Ref. [6] Scientific Reports, 2013, 3, 2169
